# Supplementary material for: Novel fluorescent probes based on rhodamine for naked-eye detection of Fe3+ and their application of imaging in living cells
Source: Royal Society of Chemistry journal article supplement (doi:10.1039/c5nj00226e), 2015-01-01
Supplement: c5nj00226e1.pdf [file c5nj00226e1.pdf]

## Supplementary Material

### Novel fluorescent probes based on rhodamine for naked-eye detection of Fe<sup>3+</sup> and application of imaging in living cells

Meipan Yang, Wenfei Meng, Na Su, Xiaojing Liu, Ming Zhang, Bingqin Yang\*

*Key Laboratory of Synthetic and Natural Functional Molecule Chemistry, Ministry of Education,  
College of Chemistry and Materials Science, Northwest University, Xi'an 710069, PR China*

#### Table of contents

1. X-ray tables of probes L1 and L2.
2. Spectroscopic properties
3. <sup>1</sup>H NMR, <sup>13</sup>C NMR and MS spectra

**Table S1** X-ray table of compound **L1**.

|                                                   |                                                                                   |
|---------------------------------------------------|-----------------------------------------------------------------------------------|
| Compound                                          | <b>L1</b>                                                                         |
| Formula                                           | C <sub>35</sub> H <sub>37</sub> N <sub>3</sub> O <sub>2</sub> S                   |
| Formula weight                                    | 563.74                                                                            |
| Temperature (K)                                   | 296(2)                                                                            |
| Wavelength (Å)                                    | 0.71073                                                                           |
| Crystal system                                    | Monoclinic                                                                        |
| space group                                       | P2(1)/c                                                                           |
| Volume (Å <sup>3</sup> )                          | 3035.2(9)                                                                         |
| Z                                                 | 4                                                                                 |
| Unit cell dimensions /(Å, °)                      | a = 8.7284(15)    α= 90<br>b =17.138(3)    β= 90.986(4)<br>c = 20.293(4)    γ= 90 |
| Calculated density (Mg/m <sup>3</sup> )           | 1.234                                                                             |
| Absorption coefficient (mm <sup>-1</sup> )        | 0.143                                                                             |
| F(000)                                            | 1200                                                                              |
| Crystal size (mm <sup>3</sup> )                   | 0.37 x 0.29 x 0.14                                                                |
| Theta range for data collection (°)               | 2.01 - 25.05                                                                      |
| Limiting indices                                  | -10<=h<=9<br>-16<=k<=20<br>-24<=l<=24                                             |
| Reflections collected / unique                    | 14870 / 5365 [R(int) = 0.0844]                                                    |
| Completeness to θ = 25.10                         | 99.7 %                                                                            |
| Max. and min. transmission                        | 0.9800 and 0.9498                                                                 |
| Refinement method                                 | Full-matrix least-squares on F <sup>2</sup>                                       |
| Data / restraints / parameters                    | 5365 / 4 /397                                                                     |
| Goodness-of-fit on F <sup>2</sup>                 | 1.028                                                                             |
| Final R indices [I>2σ (I)]                        | R1 = 0.0804, wR2 = 0.1809                                                         |
| R indices (all data)                              | R1 = 0.1756, wR2 = 0.2260                                                         |
| Largest diff. peak and hole/(e. Å <sup>-3</sup> ) | 0.373 and -0.335                                                                  |
| CCDC                                              | 1029970                                                                           |

**Table S2** X-ray table of compound **L2**.

|                                                   |                                                                               |
|---------------------------------------------------|-------------------------------------------------------------------------------|
| Compound                                          | <b>L2</b>                                                                     |
| Formula                                           | C <sub>37</sub> H <sub>39</sub> N <sub>3</sub> O <sub>2</sub> S               |
| Formula weight                                    | 589.21                                                                        |
| Temperature (K)                                   | 296(2)                                                                        |
| Wavelength (Å)                                    | 0.71073                                                                       |
| Crystal system                                    | Orthorhombic                                                                  |
| space group                                       | P2(1)2(1)2(1)                                                                 |
| Volume (Å <sup>3</sup> )                          | 3199.7(5)                                                                     |
| Z                                                 | 4                                                                             |
| Unit cell dimensions /(Å, °)                      | a = 9.0224(8)    α= 90<br>b =11.6701 (10)    β= 90<br>c = 30.389 (3)    γ= 90 |
| Calculated density (Mg/m <sup>3</sup> )           | 1.224                                                                         |
| Absorption coefficient (mm <sup>-1</sup> )        | 0.138                                                                         |
| F(000)                                            | 1256                                                                          |
| Crystal size (mm <sup>3</sup> )                   | 0.36x 0.31 x 0.23                                                             |
| Theta range for data collection (°)               | 1.87 - 25.10                                                                  |
| Limiting indices                                  | -9<=h<=10<br>-11<=k<=13<br>-33<=l<=36                                         |
| Reflections collected / unique                    | 16148 / 5709 [R(int) = 0.0486]                                                |
| Completeness to θ = 25.10                         | 99.9 %                                                                        |
| Max. and min. transmission                        | 0.9684 and 0.9521                                                             |
| Refinement method                                 | Full-matrix least-squares on F <sup>2</sup>                                   |
| Data / restraints / parameters                    | 5709 / 5 /414                                                                 |
| Goodness-of-fit on F <sup>2</sup>                 | 1.063                                                                         |
| Final R indices [I>2σ (I)]                        | R1 = 0.0580, wR2 = 0.1180                                                     |
| R indices (all data)                              | R1 = 0.0722, wR2 = 0.1245                                                     |
| Largest diff. peak and hole/(e. Å <sup>-3</sup> ) | 0.178 and -0.150                                                              |
| CCDC                                              | 1029971                                                                       |

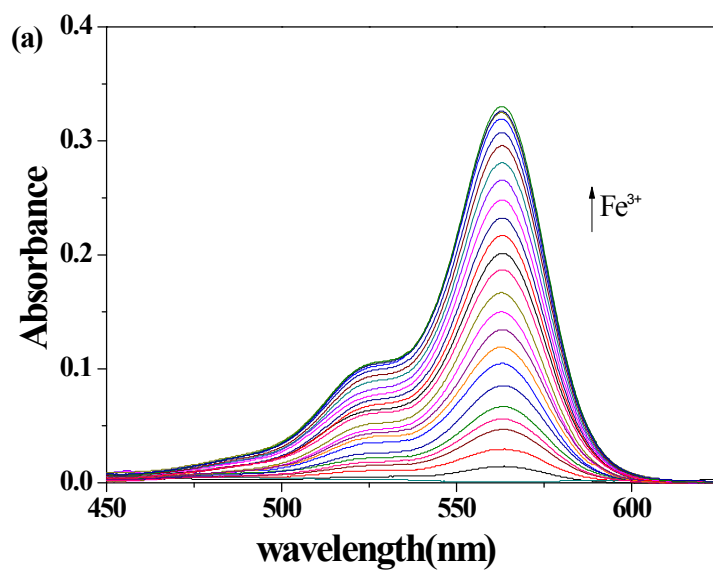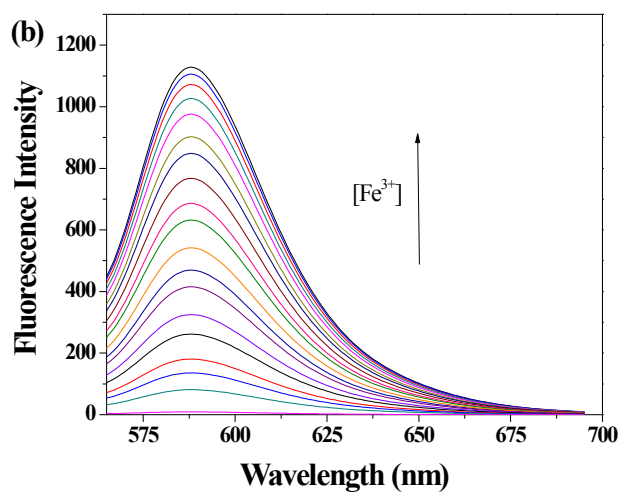

**Fig. S1** Absorbance (a) and fluorescence (b) titration spectra of L2 (20  $\mu\text{M}$ ) in methanol-water (1:1, v/v) upon addition of  $\text{Fe}^{3+}$  ( $\lambda_{\text{ex}}=550$  nm).

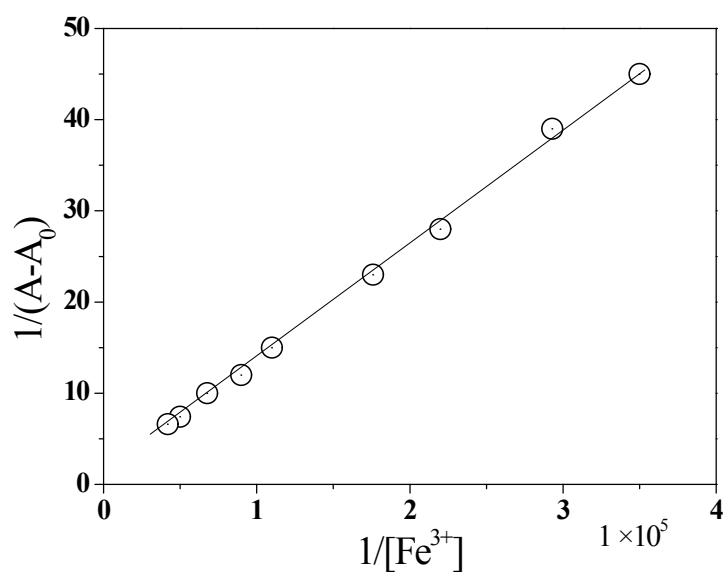

**Fig. S2** Benesi-Hildebrand plot of **L1** using 1:1 stoichiometry for association between **L1** and  $\text{Fe}^{3+}$ .

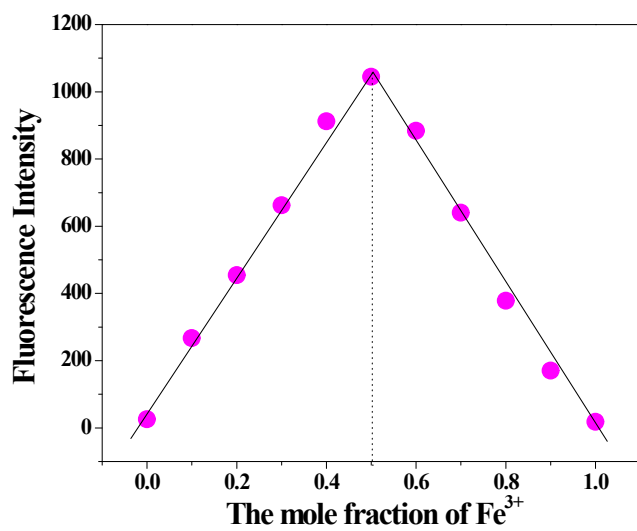

**Fig. S3** The Job's plot of probe **L2** and Fe<sup>3+</sup> (the total concentration was 20  $\mu$ M).

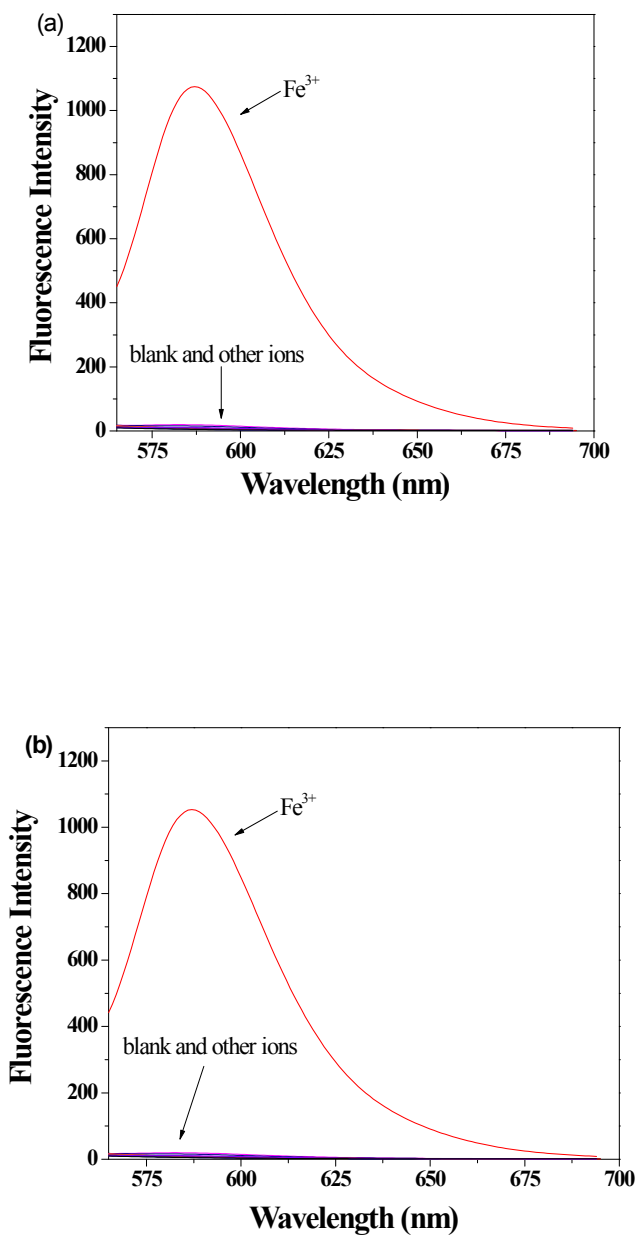

**Fig. S4** Fluorescence spectra of **L1** (a) and **L2** (b) upon addition of different metal ions in methanol-water (1/1, v/v) solution.

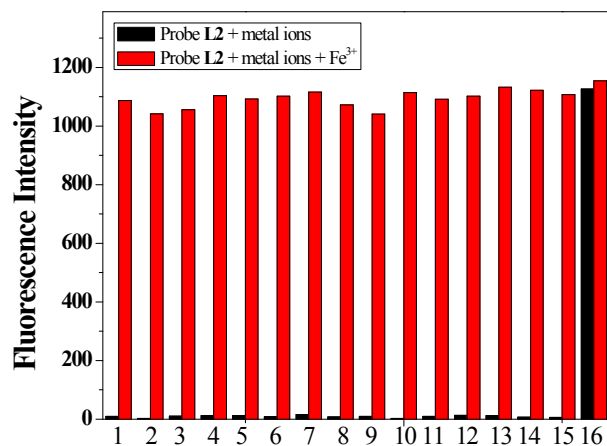

**Fig. S5** Fluorescence intensity changes of **L2** (20  $\mu\text{M}$ ) upon the addition of various metal ions (20  $\mu\text{M}$ ) in and without the presence of  $\text{Fe}^{3+}$  (20  $\mu\text{M}$ ). The black bars represent the fluorescence response of **L2** and competing ions: 1, blank; 2  $\text{K}^+$ ; 3,  $\text{Ca}^{2+}$ ; 4,  $\text{Cd}^{2+}$ ; 5,  $\text{Mg}^{2+}$ ; 6,  $\text{Co}^{2+}$ ; 7,  $\text{Mn}^{2+}$ ; 8,  $\text{Cu}^{2+}$ ; 9,  $\text{Al}^{3+}$ ; 10,  $\text{Zn}^{2+}$ ; 11,  $\text{Ni}^{2+}$ ; 12,  $\text{Fe}^{2+}$ ; 13,  $\text{Hg}^{2+}$ ; 14,  $\text{Cr}^{3+}$ ; 15,  $\text{Na}^+$ ; 16,  $\text{Fe}^{3+}$ . The red bars represent the subsequent addition of 20  $\mu\text{M}$   $\text{Fe}^{3+}$  to the above solutions.  $\lambda_{\text{ex}} = 550 \text{ nm}$ .



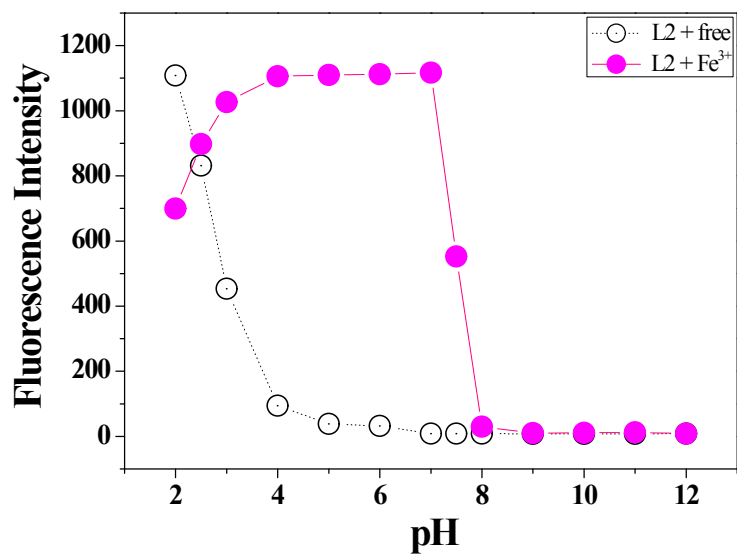

**Fig. S6** Effect of pH on fluorescence intensity of **L2** in the absence and presence of  $\text{Fe}^{3+}$ .

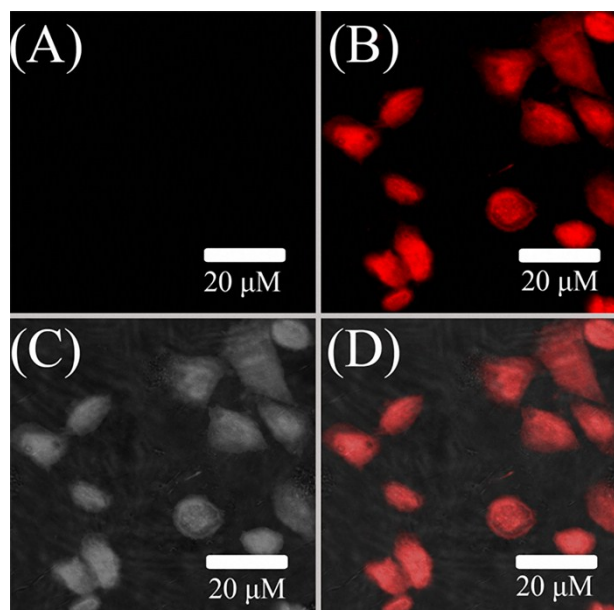

**Fig. S7** Confocal fluorescence and bright-field images of HepG2 cells (scale bar = 20  $\mu\text{M}$ ). (A) Cells incubated with 20  $\mu\text{M}$  L2 for 60 min. (B) and then further incubated with 20  $\mu\text{M}$   $\text{Fe}^{3+}$  for 90 min. (C) Bright-field image of cells shown in panel, confirming their viability. (D) The overlay image of (B) and (C).

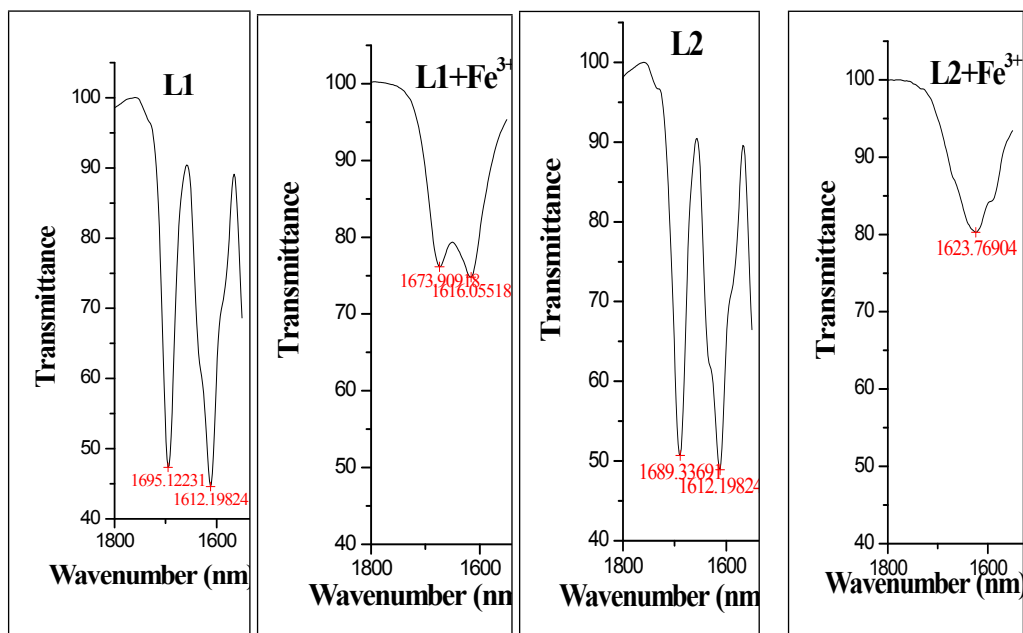

**Fig. S8** IR spectra of **L1**, **L1 + Fe<sup>3+</sup>**, **L2**, **L2 + Fe<sup>3+</sup>**.

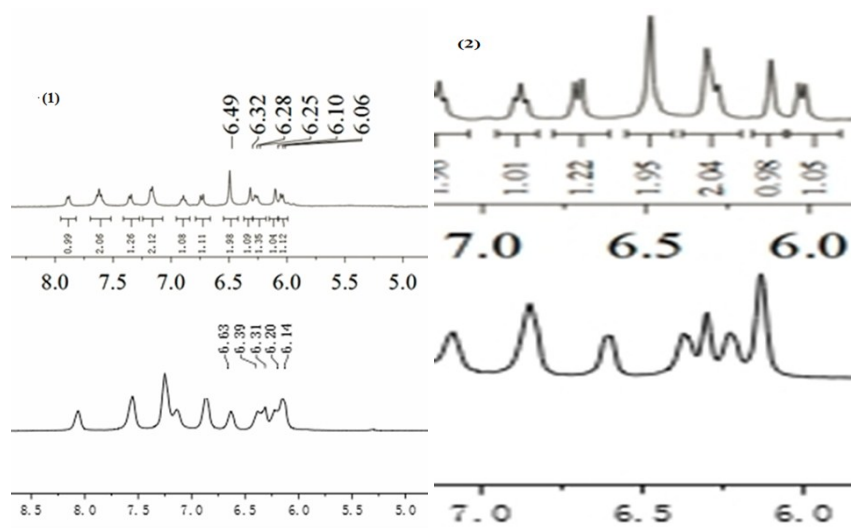

**Fig. S9** <sup>1</sup>H NMR spectrum changes of L1 (1) and L2 (2) after addition of Fe<sup>3+</sup>.

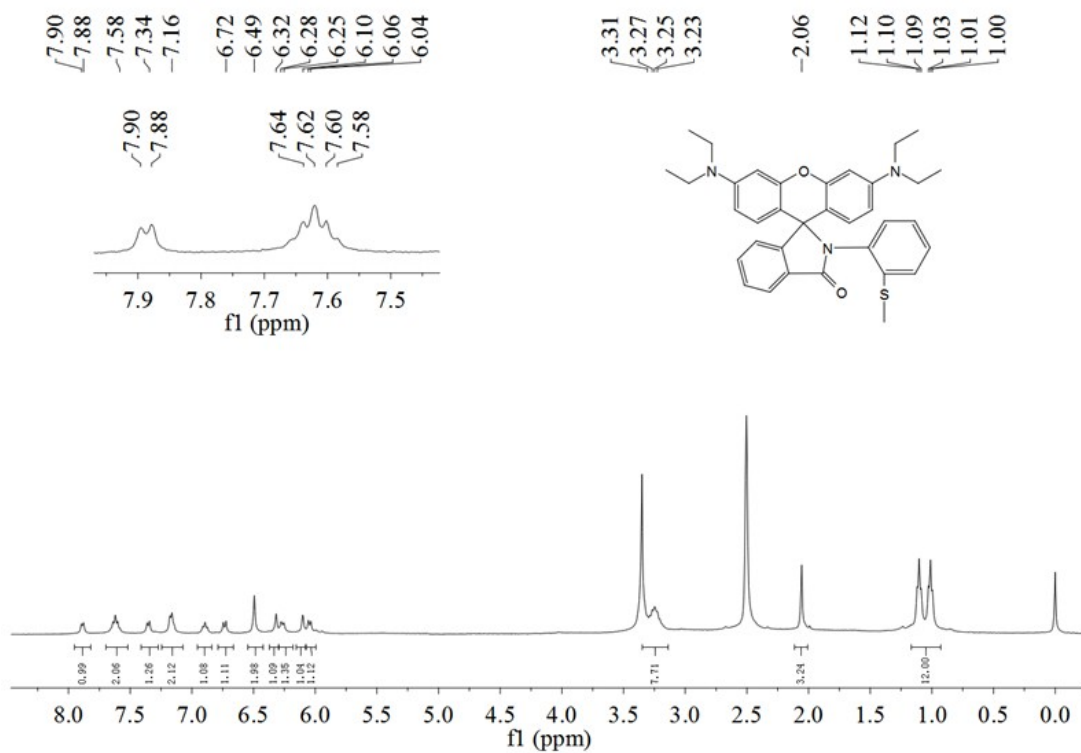

**Fig. S10** <sup>1</sup>H NMR spectrum of L1 in DMSO-*d*<sub>6</sub>

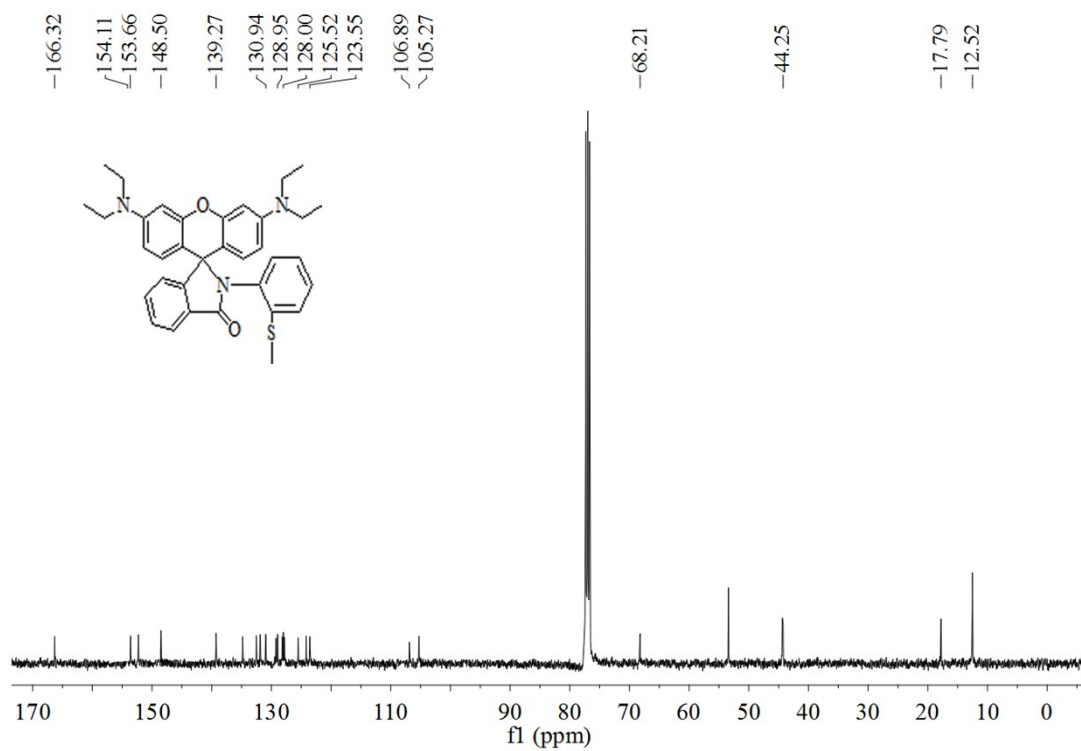

**Fig. S11** <sup>13</sup>C NMR spectrum of **L1** in CDCl<sub>3</sub>.



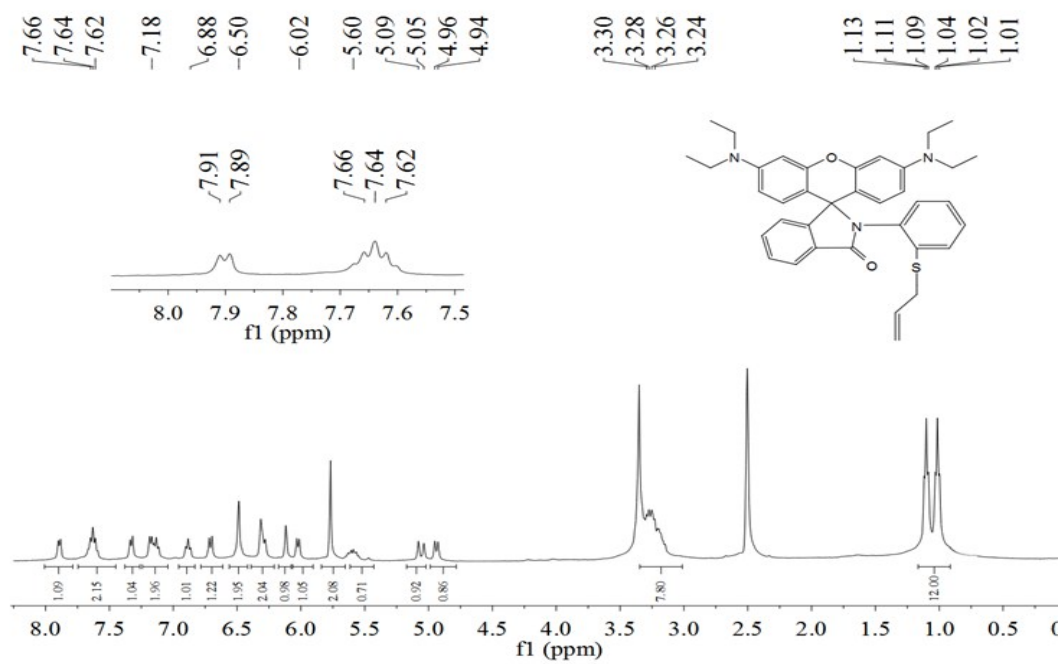

**Fig. S13**  $^1\text{H}$  NMR spectrum of L2 in  $\text{DMSO-}d_6$



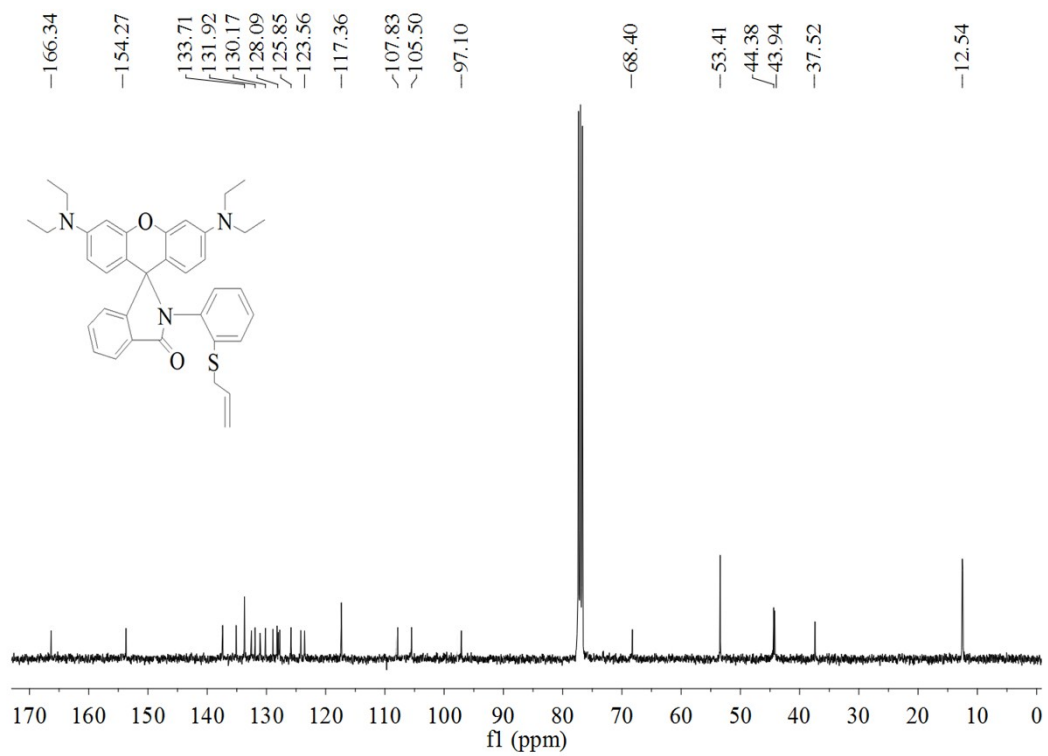

**Fig. S14** <sup>13</sup>C NMR spectrum of L2 in CDCl<sub>3</sub>.

## Mass Spectrum SmartFormula Report

|                      |                                     |                   |                     |
|----------------------|-------------------------------------|-------------------|---------------------|
| <b>Analysis Info</b> |                                     | Acquisition Date  | 2013-11-25 17:37:24 |
| Analysis Name        | D:\IAOAE\y\y\bq_mengwenfei.aa\OOféd | Operator          | NWU                 |
| Method               | tune_low 50-500.m                   | Instrument / Ser# | micrOTOF-Q II 10280 |
| Sample Name          | 1344129                             |                   |                     |
| Comment              |                                     |                   |                     |

|                              |            |                       |            |                  |           |
|------------------------------|------------|-----------------------|------------|------------------|-----------|
| <b>Acquisition Parameter</b> |            |                       |            |                  |           |
| Source Type                  | ESI        | Ion Polarity          | Positive   | Set Nebulizer    | 0.4 Bar   |
| Focus                        | Not active | Set Capillary         | 4500 V     | Set Dry Heater   | 180 °C    |
| Scan Begin                   | 50 m/z     | Set End Plate Offset  | -500 V     | Set Dry Gas      | 4.0 l/min |
| Scan End                     | 3000 m/z   | Set Collision Cell RF | 1000.0 Vpp | Set Divert Valve | Source    |

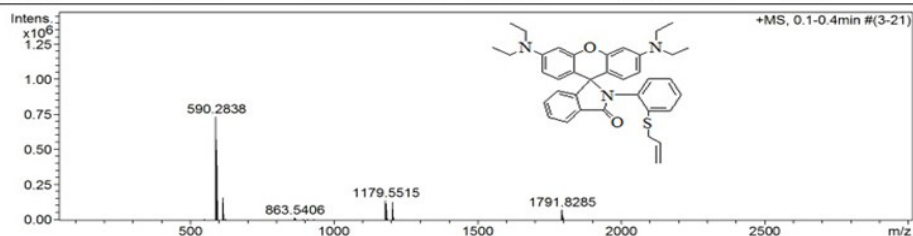

| Meas. m/z | # | Formula                | Score  | m/z      | err [mDa] | err [ppm] | mSigma | rdb  | ej Conf | N-R ule |
|-----------|---|------------------------|--------|----------|-----------|-----------|--------|------|---------|---------|
| 590.2838  | 1 | C 37 H 40 N 3 O 2 S    | 100.00 | 590.2836 | -0.2      | -0.4      | 117.0  | 19.5 | even    | ok      |
|           | 2 | C 29 H 44 N 5 O 4 S 2  | 13.28  | 590.2829 | -0.9      | -1.5      | 145.8  | 10.5 | even    | ok      |
|           | 3 | C 22 H 44 N 11 O 2 S 3 | 5.09   | 590.2836 | -0.2      | -0.4      | 165.0  | 6.5  | even    | ok      |
|           | 4 | C 21 H 48 N 7 O 6 S 3  | 1.07   | 590.2823 | -1.5      | -2.6      | 176.2  | 1.5  | even    | ok      |
|           | 5 | C 25 H 44 N 5 O 9 S    | 0.26   | 590.2854 | 1.6       | 2.7       | 193.7  | 6.5  | even    | ok      |
|           | 6 | C 22 H 36 N 15 O 3 S   | 0.55   | 590.2841 | 0.3       | 0.4       | 193.7  | 12.5 | even    | ok      |
|           | 7 | C 21 H 40 N 11 O 7 S   | 0.13   | 590.2827 | -1.1      | -1.8      | 205.6  | 7.5  | even    | ok      |
|           | 8 | C 18 H 44 N 11 O 7 S 2 | 0.03   | 590.2861 | 2.3       | 3.9       | 212.8  | 2.5  | even    | ok      |
|           | 9 | C 14 H 40 N 17 O 5 S 2 | 0.03   | 590.2834 | -0.4      | -0.7      | 224.4  | 3.5  | even    | ok      |

Fig. S15 Mass spectrum of L2.
